# Visuomotor Performance in *KCNJ11*-Related Neonatal Diabetes Is Impaired in Children With DEND-Associated Mutations and May Be Improved by Early Treatment With Sulfonylureas

RESHMA P. SHAH, MD<sup>1</sup>  
KAREN SPRUYT, PHD<sup>2</sup>  
BRIGETTE C. KRAGIE<sup>1</sup>

SIRI ATMA W. GREELEY, MD, PHD<sup>3</sup>  
MICHAEL E. MSALL, MD<sup>1</sup>

## RESEARCH DESIGN AND METHODS

**OBJECTIVE**—To assess performance on an age-standardized neuromotor coordination task among sulfonylurea-treated *KCNJ11*-related neonatal diabetic patients.

**RESEARCH DESIGN AND METHODS**—Nineteen children carrying *KCNJ11* mutations associated with isolated diabetes (R201H; *n* = 8), diabetes with neurodevelopmental impairment (V59M or V59A [V59M/A]; *n* = 8), or diabetes not consistently associated with neurodevelopmental disability (Y330C, E322K, or R201C; *n* = 3) were studied using the age-standardized Beery-Buktenica Developmental Test of Visual-Motor Integration (VMI).

**RESULTS**—Although R201H subjects tested in the normal range (median standard score = 107), children with V59M/A mutations had significantly lower than expected VMI standard scores (median = 49). The scores for all three groups were significantly different from each other (*P* = 0.0017). The age of sulfonylurea initiation was inversely correlated with VMI scores in the V59M/A group (*P* < 0.05).

**CONCLUSIONS**—Neurodevelopmental disability in *KCNJ11*-related diabetes includes visuomotor problems that may be ameliorated by early sulfonylurea treatment. Comprehensive longitudinal assessment on larger samples will be imperative.

*Diabetes Care* 35:2086–2088, 2012

Neonatal diabetes due to activating mutations in the ATP-sensitive potassium channel genes *KCNJ11* and *ABCC8* responds to oral sulfonylureas instead of insulin (1). Approximately 25% of such patients have associated neurodevelopmental disability termed the developmental delay, epilepsy, and neonatal diabetes (DEND) syndrome, likely related to expression of mutated channels in the brain (2–5). The *KCNJ11* V59M mutation is a common cause of intermediate DEND,

characterized by speech, motor, and cognitive impairment without epilepsy (6,7). Cognitive and motor skills improved after sulfonylurea therapy in a few intermediate DEND case reports (8–10); however, systematic assessment of particular impairments using validated instruments has not been performed in aggregate numbers. Here, we report on 19 rare *KCNJ11* neonatal diabetes cases assessed at one time with the same well-researched, age-standardized test.

## Participants

All subjects were evaluated during a 2010 family forum in Chicago, as part of our Monogenic Diabetes Registry (<http://monogenicdiabetes.uchicago.edu>) (11). All parents provided informed written consent as approved by The University of Chicago institutional review board.

## Beery-Buktenica Developmental Test of Visual-Motor Integration

The Beery-Buktenica Developmental Test of Visual-Motor Integration (VMI) presents drawings of geometric forms in order of increasing difficulty to be copied with paper and pencil for subjects >2 years of age. The VMI is often administered to evaluate visual-motor and visual-perceptual deficits. It has a coefficient  $\alpha$  of 0.82, and its validity has been established (12–14). The VMI was individually administered by a single clinician trained in the assessment. Raw scores are converted to age-appropriate standard scores.

## Statistical analysis

Statistica (version 10.0; <http://www.statsoft.com>) was used for all analyses. Nonparametric analysis was performed using the Kruskal-Wallis ANOVA test (with value *H*) for group comparisons, as well as Spearman correlations.

**RESULTS**—Nineteen subjects 2.2–20.3 years of age participated in the study. Eight subjects had the R201H mutation characterized by isolated diabetes without neurodevelopmental concerns, eight had V59M or V59A (V59M/A) mutations associated with the intermediate DEND syndrome, and three had mutations that have an inconsistently reported neurodevelopmental phenotype (one each with R201C, Y330C, and E322K) (Table 1). All subjects were being successfully treated with oral sulfonylurea monotherapy.

From the <sup>1</sup>Section of Developmental and Behavioral Pediatrics and John P. Kennedy Jr. Intellectual and Developmental Disabilities Research Center, Department of Pediatrics, Comer Children's Hospital and Pritzker School of Medicine, The University of Chicago, Chicago, Illinois; the <sup>2</sup>Section of Pediatric Sleep Medicine, Department of Pediatrics, Comer Children's Hospital and Pritzker School of Medicine, The University of Chicago, Chicago, Illinois; and the <sup>3</sup>Section of Adult and Pediatric Endocrinology, Diabetes, and Metabolism, Department of Medicine, The University of Chicago, Chicago, Illinois.

Corresponding author: Siri Atma W. Greeley, [sgreeley@uchicago.edu](mailto:sgreeley@uchicago.edu).

Received 16 November 2011 and accepted 1 May 2012.

DOI: 10.2337/dc11-2225

This article contains Supplementary Data online at <http://care.diabetesjournals.org/lookup/suppl/doi:10.2337/dc11-2225/-/DC1>.

S.A.W.G. and M.E.M. contributed equally to this study.

© 2012 by the American Diabetes Association. Readers may use this article as long as the work is properly cited, the use is educational and not for profit, and the work is not altered. See <http://creativecommons.org/licenses/by-nc-nd/3.0/> for details.

Overall, no group differences were found in age (Kruskal-Wallis ANOVA group comparison  $H [2, N = 19] = 1.9; P = 0.39$ ), sex distribution ( $\chi^2 [2] = 0.79; P = 0.68$ ), age of diabetes diagnosis ( $H [2, N = 19] = 2.1; P = 0.35$ ), or age of treatment initiation ( $H [2, N = 19] = 2.2; P = 0.33$ ) among the three groups.

The three groups differed significantly ( $H [2, N = 19] = 12.78787; P = 0.0017$ ) from each other in graphomotor constructional abilities necessary for accurate copying of the VMI geometric figures (Table 1 and Supplementary Fig. 1). Namely, in children with R201H, scores fell within the normal range (median = 107, lower quartile = 93, and upper quartile = 118.5), whereas children with V59M/A scored low to very low (median = 49, lower quartile = 49, upper quartile = 74.5), and scores of children with other mutations were intermediate

(median = 89, lower quartile = 65, and upper quartile = 91).

Age at treatment initiation was significantly inversely correlated with VMI scores only in the V59M/A group (Spearman correlation =  $-0.79, P < 0.05$ ) (Supplementary Table 1). All three children with V59M/A who had transitioned to sulfonylureas before their first birthday had standard scores  $>70$ , whereas the five children whose treatment started later scored  $<50$  (greater than three SDs below the mean).

**CONCLUSIONS**—To our knowledge, our study represents the largest cohort of rare *KCNJ11* neonatal diabetic patients undergoing an identical neurodevelopmental assessment at one time. Using a well-validated, age-standardized measure, we show that those with intermediate

DEND-associated V59M/A mutations have significant impairment of eye-hand coordination, whereas those with the R201H mutation not associated with neurodevelopmental concerns performed in the normal range. Early treatment with sulfonylureas was associated with better VMI scores in the V59M/A group; however, this observation must be confirmed in larger numbers of patients with more comprehensive longitudinal assessments.

Why mutations such as R201H do not cause a similar level of impairment as seen in V59M/A is uncertain, especially since the diabetes caused by these mutations appears to be equivalent. Given that a few of the R201H and other mutation case subjects exhibited low normal scores, it may be that the VMI is not sensitive enough to quantify mild subclinical difficulty.

Other factors could contribute to the neurodevelopmental concerns in these patients, including diabetic ketoacidosis at diagnosis during a very young age critical for brain development, as well as longer-term metabolic control characterized by prolonged hyperglycemia and sometimes frequent episodes of severe hypoglycemia, which has been associated with a spectrum of visual-spatial, memory, attention, and executive dysfunctions (15).

The current study and previous reports of improved cognitive and motor symptoms after the change in treatment suggest the benefit of sulfonylurea blockade of activated glucose-responsive channels that have an unknown function in the brain (8–10). This implies that sulfonylureas cross the blood-brain barrier; however, the degree to which they do may be a critically important factor and warrants further study.

The three V59M/A subjects who started sulfonylurea therapy before 1 year of age had better VMI scores than the five subjects who did not; however, it remains to be determined whether there is a definitive critical age for treatment. This finding raises hope for prevention of at least some of the neurodevelopmental disability in those who start sulfonylureas at an early age. This bolsters consideration of an empirical trial of sulfonylureas in newly diagnosed neonatal diabetic patients before results of genetic testing are available, given that ATP-sensitive potassium channel mutations cause almost 50% of cases. However, the risk/benefit of sulfonylureas should be carefully considered and should in no way supplant mandatory genetic testing.

Notably, VMI scores in the three V59M/A children treated early were still low and developmental challenges are

**Table 1—Clinical characteristics and results of Beery-Buktenica VMI testing in patients with monogenic neonatal diabetes caused by R201H (n = 8), V59M or V59A (n = 8), or other (n = 3) mutations in *KCNJ11***

| ID                                                             | Mutation | Current age (years) | Sex     | Age of diabetes diagnosis (months) | Age of sulfonylurea initiation (months) | Standard scores* |
|----------------------------------------------------------------|----------|---------------------|---------|------------------------------------|-----------------------------------------|------------------|
| R201H mutation causing isolated diabetes (n = 8)               |          |                     |         |                                    |                                         |                  |
| 0165                                                           | R201H    | 2.7                 | M       | 2.0                                | 6                                       | 137              |
| 0130                                                           | R201H    | 2.9                 | F       | 3.5                                | 6                                       | 109              |
| 0261                                                           | R201H    | 4.4                 | F       | 2.0                                | 29                                      | 85               |
| 0021                                                           | R201H    | 7.7                 | F       | 6.0                                | 47                                      | 119              |
| 0142                                                           | R201H    | 9.1                 | M       | 2.5                                | 82                                      | 94               |
| 0004                                                           | R201H    | 9.2                 | F       | 2.0                                | 67                                      | 118              |
| 0074                                                           | R201H    | 18                  | M       | 0.5                                | 177                                     | 105              |
| 0145                                                           | R201H    | 20.3                | F       | 1.0                                | 227                                     | 92               |
|                                                                | Median   | 9.3 (mean)          | 37.5% M | 2.0                                | 57                                      | 107              |
|                                                                | SD       | 6.6                 |         | 1.7                                | 81                                      | 17.1             |
| Mutations causing intermediate DEND syndrome (n = 8)           |          |                     |         |                                    |                                         |                  |
| 0260                                                           | V59M     | 2.2                 | F       | 3.0                                | 4                                       | 91               |
| 0178                                                           | V59M     | 2.7                 | M       | 4.0                                | 9                                       | 77               |
| 0259                                                           | V59M     | 3.6                 | F       | 1.5                                | 2                                       | 72               |
| 0258                                                           | V59M     | 4.2                 | M       | 1.0                                | 15                                      | $<50$            |
| 0216                                                           | V59M     | 5.3                 | M       | 4.5                                | 22                                      | $<50$            |
| 0076                                                           | V59M     | 6                   | M       | 6.0                                | 33                                      | $<50$            |
| 0100                                                           | V59M     | 17                  | F       | 5.5                                | 178                                     | $<50$            |
| 0257                                                           | V59A     | 5.2                 | F       | 5.0                                | 42                                      | $<50$            |
|                                                                | Median   | 5.8 (mean)          | 50% M   | 4.3                                | 19                                      | $<50$            |
|                                                                | SD       | 4.7                 |         | 1.8                                | 58                                      | 9.8              |
| Mutations causing inconsistent developmental phenotype (n = 3) |          |                     |         |                                    |                                         |                  |
| 0164                                                           | Y330C    | 3.3                 | M       | 2.5                                | 13                                      | 65               |
| 0088                                                           | E322 K   | 7.1                 | M       | 5.0                                | 48                                      | 91               |
| 0000                                                           | R201C    | 10.6                | F       | 1.0                                | 79                                      | 89               |
|                                                                | Median   | 7.0 (mean)          | 66.7% M | 2.5                                | 48                                      | 89               |
|                                                                | SD       | 3.7                 |         | 2.0                                | 33                                      | 14.5             |

F, female; M, male. \*Standard scores have a mean of 100 and an SD of 15. Scores greater than three SDs below the mean are reported as  $<50$ , but were treated as 49 in all statistical analyses.

likely to persist, as is also likely in rare severe DEND cases not assessed in this study. Future research should clarify factors leading to differences in mutation phenotype and outcome. Efforts should include comprehensive specialty assessment and support of optimal progress and continued collection of data on greater numbers of patients tracking long-term neurodevelopmental outcome. In this regard, the VMI may be useful as a quantifiable marker of longitudinal progress.

**Acknowledgments**—The authors are grateful for generous support from the Lewis-Sebring Family Foundation and the Kovler Family Foundation and also acknowledge support from the Juvenile Diabetes Research Foundation (9-2008-177), the American Diabetes Association (1-11-CT-41), and the National Institutes of Health (NIH) (P60-DK-020595 and UL1-RR-024999). R.P.S. was supported in part as a Comer Scholar. R.P.S. and M.E.M. were supported in part by the Health Resources and Services Administration of the U.S. Department of Health and Human Services (T 73 MC11047 entitled Leadership Education in Neurodevelopmental Disabilities) and the NIH/the Eunice Kennedy Shriver National Institute of Child Health and Human Development (P30-HD-054275; John P. Kennedy Jr. Intellectual and Developmental Disabilities Research Center).

No potential conflicts of interest relevant to this article were reported.

R.P.S. contributed to study design; collected, analyzed, and interpreted data; and wrote the manuscript. K.S. provided biostatistical analysis and interpretation of data. B.C.K. provided technical support and analyzed and interpreted data. S.A.W.G. designed the study; collected, analyzed, and interpreted data; provided administrative and material support; obtained funding; and supervised the study. M.E.M. designed the study, interpreted data, provided administrative and material support, obtained funding, and supervised the study. All authors reviewed and edited the manuscript, contributed to discussion, and approved the final manuscript. S.A.W.G. and M.E.M. are the guarantors of this

work and, as such, had full access to all the data in the study and take responsibility for the integrity of the data and the accuracy of the data analysis.

The authors would like to thank all of the patients, family members, and clinicians who have participated in The University of Chicago Monogenic Diabetes Registry (<http://monogenicdiabetes.org>) and in this study in particular. The authors thank Graeme Bell and Louis Philipson (both at The University of Chicago, Chicago, IL) and all the staff and volunteers who made the first Monogenic Diabetes Family Meeting in Chicago in 2010 such a success.

## References

- Pearson ER, Flechtner I, Njolstad PR, et al.; Neonatal Diabetes International Collaborative Group. Switching from insulin to oral sulfonylureas in patients with diabetes due to Kir6.2 mutations. *N Engl J Med* 2006;355:467–477
- Gloyn AL, Pearson ER, Antcliff JF, et al. Activating mutations in the gene encoding the ATP-sensitive potassium-channel subunit Kir6.2 and permanent neonatal diabetes. *N Engl J Med* 2004;350:1838–1849
- Flanagan SE, Edghill EL, Gloyn AL, Ellard S, Hattersley AT. Mutations in KCNJ11, which encodes Kir6.2, are a common cause of diabetes diagnosed in the first 6 months of life, with the phenotype determined by genotype. *Diabetologia* 2006;49:1190–1197
- Clark RH, McTaggart JS, Webster R, et al. Muscle dysfunction caused by a KATP channel mutation in neonatal diabetes is neuronal in origin. *Science* 2010;329:458–461
- Dunn-Meynell AA, Rawson NE, Levin BE. Distribution and phenotype of neurons containing the ATP-sensitive K<sup>+</sup> channel in rat brain. *Brain Res* 1998;814:41–54
- Hattersley AT, Ashcroft FM. Activating mutations in Kir6.2 and neonatal diabetes: new clinical syndromes, new scientific insights, and new therapy. *Diabetes* 2005;54:2503–2513
- Slingerland AS, Hattersley AT. Mutations in the Kir6.2 subunit of the KATP channel and permanent neonatal diabetes: new insights and new treatment. *Ann Med* 2005;37:186–195
- Slingerland AS, Nuboe R, Hadders-Algra M, Hattersley AT, Bruining GJ. Improved motor development and good long-term glycaemic control with sulfonylurea treatment in a patient with the syndrome of intermediate developmental delay, early-onset generalised epilepsy and neonatal diabetes associated with the V59M mutation in the KCNJ11 gene. *Diabetologia* 2006;49:2559–2563
- Slingerland AS, Hurkx W, Noordam K, et al. Sulphonylurea therapy improves cognition in a patient with the V59M KCNJ11 mutation. *Diabet Med* 2008;25:277–281
- Mlynarski W, Tarasov AI, Gach A, et al. Sulfonylurea improves CNS function in a case of intermediate DEND syndrome caused by a mutation in KCNJ11. *Nat Clin Pract Neurol* 2007;3:640–645
- Greeley SA, Naylor RN, Cook LS, Tucker SE, Lipton RB, Philipson LH. Creation of the Web-based University of Chicago Monogenic Diabetes Registry: using technology to facilitate longitudinal study of rare subtypes of diabetes. *J Diabetes Sci Tech* 2011;5:879–886
- Beery KE, Beery NA. *The Beery-Buktenica Developmental Test of Visual-Motor Integration: Beery VMI Administration, Scoring, and Teaching*. 6th ed. San Antonio, TX, Pearson Psychological Corporation, 2010
- Preda C. Test of visual-motor integration: construct validity in a comparison with the Beery-Buktenica Developmental Test of Visual-Motor Integration. *Percept Mot Skills* 1997;84:1439–1443
- Atkinson J, Braddick O. From genes to brain development to phenotypic behavior: “dorsal-stream vulnerability” in relation to spatial cognition, attention, and planning of actions in Williams syndrome (WS) and other developmental disorders. *Prog Brain Res* 2011;189:261–283
- Clarke W, Jones T, Rewers A, Dunger D, Klingensmith GJ. Assessment and management of hypoglycemia in children and adolescents with diabetes. *Pediatr Diabetes* 2009;10(Suppl. 12):134–145
